# Supplementary material for: Ellipse-Fit Alignment for Robust 2D Shape Recognition
Source: Research Square preprint supplement (doi:10.21203/rs.3.rs-5716650/v1), 2024-12-30
Supplement: Supplementary file 1 [file Kimia_10test_1train_Accuracies.xlsx]

## Sheet: Sheet1
Row	Class1	Class2	Class3	Class4	Class5	Class6	Class7	Class8	Class9	Overall
TPR Accuracy	0	75	5	18	48	82	43	100	0	41.2
TNR Accuracy	15	0	1	8	0	0	1	6	100	14.6
PPV Accuracy	35	1	8	43	0	0	7	44	99	26.3
NPV Accuracy	0	75	5	25	50	82	43	100	0	42.2
FPR Accuracy	15	0	1	8	0	0	1	6	100	14.6
FNR Accuracy	0	75	5	18	48	82	43	100	0	41.2
FDR Accuracy	35	1	8	43	0	0	7	44	99	26.3
FOR Accuracy	0	75	5	25	50	82	43	100	0	42.2
TS Accuracy	99	86	50	64	81	88	35	100	62	73.9
ACC Accuracy	95	92	61	59	84	86	35	100	94	78.4
BA Accuracy	18	77	8	39	60	85	38	100	9	48.2
F1 Accuracy	99	86	50	64	81	88	35	100	62	73.9
MCC Accuracy	99	87	51	62	86	89	37	100	57	74.2
FM Accuracy	99	87	48	59	83	88	35	100	57	72.9
BM Accuracy	18	77	8	39	60	85	38	100	9	48.2
MK Accuracy	48	86	17	46	14	53	32	95	96	54.1
Vote Accuracy	80	88	14	47	62	85	37	100	76	65.4
