# Supplementary material for: Ellipse-Fit Alignment for Robust 2D Shape Recognition
Source: Research Square preprint supplement (doi:10.21203/rs.3.rs-5716650/v1), 2024-12-30
Supplement: Supplementary file 2 [file Kimia_1test_10train_Accuracies.xlsx]

## Sheet: Sheet1
Row	Class1	Class2	Class3	Class4	Class5	Class6	Class7	Class8	Class9	Overall
TPR Accuracy	0	70	30	80	90	100	80	100	0	61.1
TNR Accuracy	0	0	0	40	0	0	10	10	100	17.8
PPV Accuracy	0	0	20	100	0	0	50	100	100	41.1
NPV Accuracy	0	70	30	100	100	100	80	100	0	64.4
FPR Accuracy	0	0	0	40	0	0	10	10	100	17.8
FNR Accuracy	0	70	30	80	90	100	80	100	0	61.1
FDR Accuracy	0	0	20	100	0	0	50	100	100	41.1
FOR Accuracy	0	70	30	100	100	100	80	100	0	64.4
TS Accuracy	100	100	100	100	100	100	90	100	100	98.9
ACC Accuracy	80	100	100	100	100	100	80	100	100	95.6
BA Accuracy	100	100	60	100	100	100	90	100	50	88.9
F1 Accuracy	100	100	100	100	100	100	90	100	100	98.9
MCC Accuracy	100	100	100	100	100	100	90	100	100	98.9
FM Accuracy	100	100	100	100	100	100	90	100	100	98.9
BM Accuracy	100	100	60	100	100	100	90	100	50	88.9
MK Accuracy	30	90	70	100	60	100	70	100	100	80
Vote Accuracy	100	100	100	100	100	100	90	100	100	98.9
