# Supplementary material for: Ellipse-Fit Alignment for Robust 2D Shape Recognition
Source: Research Square preprint supplement (doi:10.21203/rs.3.rs-5716650/v1), 2024-12-30
Supplement: Supplementary file 3 [file Kimia_2test_9train_Accuracies.xlsx]

## Sheet: Sheet1
Row	Class1	Class2	Class3	Class4	Class5	Class6	Class7	Class8	Class9	Overall
TPR Accuracy	0	85	15	90	75	100	70	100	0	59.4
TNR Accuracy	5	0	0	25	0	0	10	20	100	17.8
PPV Accuracy	20	0	15	100	0	0	40	85	100	40
NPV Accuracy	0	85	20	100	90	100	70	100	0	62.8
FPR Accuracy	5	0	0	25	0	0	10	20	100	17.8
FNR Accuracy	0	85	15	90	75	100	70	100	0	59.4
FDR Accuracy	20	0	15	100	0	0	40	85	100	40
FOR Accuracy	0	85	20	100	90	100	70	100	0	62.8
TS Accuracy	100	100	90	100	100	100	80	100	100	96.7
ACC Accuracy	80	100	85	100	100	100	65	100	100	92.2
BA Accuracy	85	100	40	100	100	100	80	100	50	83.9
F1 Accuracy	100	100	90	100	100	100	80	100	100	96.7
MCC Accuracy	100	100	90	100	100	100	80	100	100	96.7
FM Accuracy	100	100	90	100	100	100	80	100	100	96.7
BM Accuracy	85	100	40	100	100	100	80	100	50	83.9
MK Accuracy	55	90	50	100	55	100	50	100	100	77.8
Vote Accuracy	95	100	70	100	100	100	80	100	100	93.9
