# Supplementary material for: Ellipse-Fit Alignment for Robust 2D Shape Recognition
Source: Research Square preprint supplement (doi:10.21203/rs.3.rs-5716650/v1), 2024-12-30
Supplement: Supplementary file 4 [file Kimia_3test_8train_Accuracies.xlsx]

## Sheet: Sheet1
Row	Class1	Class2	Class3	Class4	Class5	Class6	Class7	Class8	Class9	Overall
TPR Accuracy	0	83.3	20	90	70	100	76.7	100	0	60
TNR Accuracy	3.3	0	0	20	0	0	6.7	23.3	100	17
PPV Accuracy	20	0	20	96.7	0	0	26.7	86.7	100	38.9
NPV Accuracy	0	83.3	23.3	96.7	80	100	76.7	100	0	62.2
FPR Accuracy	3.3	0	0	20	0	0	6.7	23.3	100	17
FNR Accuracy	0	83.3	20	90	70	100	76.7	100	0	60
FDR Accuracy	20	0	20	96.7	0	0	26.7	86.7	100	38.9
FOR Accuracy	0	83.3	23.3	96.7	80	100	76.7	100	0	62.2
TS Accuracy	100	100	93.3	100	100	93.3	83.3	100	100	96.7
ACC Accuracy	90	100	83.3	96.7	100	96.7	73.3	100	100	93.3
BA Accuracy	76.7	100	46.7	96.7	100	100	83.3	100	46.7	83.3
F1 Accuracy	100	100	93.3	100	100	93.3	83.3	100	100	96.7
MCC Accuracy	100	100	93.3	100	100	93.3	83.3	100	100	96.7
FM Accuracy	100	100	93.3	100	100	93.3	83.3	100	100	96.7
BM Accuracy	76.7	100	46.7	96.7	100	100	83.3	100	46.7	83.3
MK Accuracy	60	93.3	46.7	96.7	60	93.3	60	100	100	78.9
Vote Accuracy	96.7	100	66.7	96.7	100	96.7	83.3	100	100	93.3
