# Supplementary material for: Ellipse-Fit Alignment for Robust 2D Shape Recognition
Source: Research Square preprint supplement (doi:10.21203/rs.3.rs-5716650/v1), 2024-12-30
Supplement: Supplementary file 5 [file Kimia_4test_7train_Accuracies.xlsx]

## Sheet: Sheet1
Row	Class1	Class2	Class3	Class4	Class5	Class6	Class7	Class8	Class9	Overall
TPR Accuracy	0	80	22.5	75	72.5	100	77.5	100	0	58.6
TNR Accuracy	5	0	0	12.5	0	0	7.5	17.5	100	15.8
PPV Accuracy	25	0	27.5	82.5	0	0	27.5	87.5	100	38.9
NPV Accuracy	0	80	25	77.5	82.5	100	77.5	100	0	60.3
FPR Accuracy	5	0	0	12.5	0	0	7.5	17.5	100	15.8
FNR Accuracy	0	80	22.5	75	72.5	100	77.5	100	0	58.6
FDR Accuracy	25	0	27.5	82.5	0	0	27.5	87.5	100	38.9
FOR Accuracy	0	80	25	77.5	82.5	100	77.5	100	0	60.3
TS Accuracy	100	100	95	97.5	100	95	80	100	97.5	96.1
ACC Accuracy	87.5	100	87.5	87.5	100	97.5	72.5	100	100	92.5
BA Accuracy	80	100	50	82.5	100	100	80	100	35	80.8
F1 Accuracy	100	100	95	97.5	100	95	80	100	97.5	96.1
MCC Accuracy	100	100	95	97.5	100	95	80	100	95	95.8
FM Accuracy	100	100	92.5	97.5	100	95	80	100	95	95.6
BM Accuracy	80	100	50	82.5	100	100	80	100	35	80.8
MK Accuracy	62.5	92.5	55	82.5	55	95	60	100	100	78.1
Vote Accuracy	95	100	67.5	87.5	100	97.5	80	100	100	91.9
