# Supplementary material for: Ellipse-Fit Alignment for Robust 2D Shape Recognition
Source: Research Square preprint supplement (doi:10.21203/rs.3.rs-5716650/v1), 2024-12-30
Supplement: Supplementary file 6 [file Kimia_5test_6train_Accuracies.xlsx]

## Sheet: Sheet1
Row	Class1	Class2	Class3	Class4	Class5	Class6	Class7	Class8	Class9	Overall
TPR Accuracy	0	84	26	70	74	96	70	100	0	57.8
TNR Accuracy	8	0	0	20	0	0	6	26	100	17.8
PPV Accuracy	30	0	32	82	0	0	30	74	100	38.7
NPV Accuracy	0	84	28	74	80	96	70	100	0	59.1
FPR Accuracy	8	0	0	20	0	0	6	26	100	17.8
FNR Accuracy	0	84	26	70	74	96	70	100	0	57.8
FDR Accuracy	30	0	32	82	0	0	30	74	100	38.7
FOR Accuracy	0	84	28	74	80	96	70	100	0	59.1
TS Accuracy	100	100	90	96	100	88	74	100	92	93.3
ACC Accuracy	90	100	90	88	100	94	70	100	98	92.2
BA Accuracy	74	100	50	82	100	96	76	100	28	78.4
F1 Accuracy	100	100	90	96	100	88	74	100	92	93.3
MCC Accuracy	100	100	92	96	100	88	74	100	90	93.3
FM Accuracy	100	100	86	96	100	88	74	100	88	92.4
BM Accuracy	74	100	50	82	100	96	76	100	28	78.4
MK Accuracy	58	94	56	82	60	80	58	100	100	76.4
Vote Accuracy	94	100	62	84	100	92	74	100	96	89.1
