# Supplementary material for: Ellipse-Fit Alignment for Robust 2D Shape Recognition
Source: Research Square preprint supplement (doi:10.21203/rs.3.rs-5716650/v1), 2024-12-30
Supplement: Supplementary file 7 [file Kimia_6test_5train_Accuracies.xlsx]

## Sheet: Sheet1
Row	Class1	Class2	Class3	Class4	Class5	Class6	Class7	Class8	Class9	Overall
TPR Accuracy	0	86.7	23.3	68.3	75	95	70	100	0	57.6
TNR Accuracy	16.7	0	0	16.7	0	0	6.7	18.3	100	17.6
PPV Accuracy	38.3	0	26.7	81.7	0	0	33.3	70	100	38.9
NPV Accuracy	0	88.3	23.3	71.7	78.3	95	70	100	0	58.5
FPR Accuracy	16.7	0	0	16.7	0	0	6.7	18.3	100	17.6
FNR Accuracy	0	86.7	23.3	68.3	75	95	70	100	0	57.6
FDR Accuracy	38.3	0	26.7	81.7	0	0	33.3	70	100	38.9
FOR Accuracy	0	88.3	23.3	71.7	78.3	95	70	100	0	58.5
TS Accuracy	100	100	80	91.7	100	91.7	73.3	100	88.3	91.7
ACC Accuracy	91.7	100	80	85	100	95	71.7	100	98.3	91.3
BA Accuracy	73.3	98.3	43.3	81.7	100	98.3	75	100	23.3	77
F1 Accuracy	100	100	80	91.7	100	91.7	73.3	100	88.3	91.7
MCC Accuracy	100	100	81.7	91.7	100	91.7	73.3	100	85	91.5
FM Accuracy	100	100	75	91.7	100	91.7	73.3	100	85	90.7
BM Accuracy	73.3	98.3	43.3	81.7	100	98.3	75	100	23.3	77
MK Accuracy	60	95	41.7	81.7	53.3	81.7	60	100	100	74.8
Vote Accuracy	95	100	51.7	81.7	100	95	73.3	100	95	88
