# Supplementary material for: Ellipse-Fit Alignment for Robust 2D Shape Recognition
Source: Research Square preprint supplement (doi:10.21203/rs.3.rs-5716650/v1), 2024-12-30
Supplement: Supplementary file 8 [file Kimia_7test_4train_Accuracies.xlsx]

## Sheet: Sheet1
Row	Class1	Class2	Class3	Class4	Class5	Class6	Class7	Class8	Class9	Overall
TPR Accuracy	0	85.7	18.6	70	68.6	92.9	74.3	100	0	56.7
TNR Accuracy	15.7	0	0	14.3	0	0	5.7	17.1	100	17
PPV Accuracy	34.3	0	24.3	81.4	0	0	32.9	68.6	100	37.9
NPV Accuracy	0	88.6	18.6	70	74.3	92.9	74.3	100	0	57.6
FPR Accuracy	15.7	0	0	14.3	0	0	5.7	17.1	100	17
FNR Accuracy	0	85.7	18.6	70	68.6	92.9	74.3	100	0	56.7
FDR Accuracy	34.3	0	24.3	81.4	0	0	32.9	68.6	100	37.9
FOR Accuracy	0	88.6	18.6	70	74.3	92.9	74.3	100	0	57.6
TS Accuracy	100	100	81.4	91.4	98.6	97.1	72.9	100	84.3	91.7
ACC Accuracy	97.1	100	78.6	87.1	98.6	97.1	72.9	100	98.6	92.2
BA Accuracy	72.9	95.7	40	81.4	97.1	95.7	75.7	100	20	75.4
F1 Accuracy	100	100	81.4	91.4	98.6	97.1	72.9	100	84.3	91.7
MCC Accuracy	100	100	81.4	90	98.6	97.1	72.9	100	81.4	91.3
FM Accuracy	100	100	78.6	90	98.6	97.1	72.9	100	81.4	91
BM Accuracy	72.9	95.7	40	81.4	97.1	95.7	75.7	100	20	75.4
MK Accuracy	64.3	95.7	35.7	81.4	50	84.3	62.9	100	100	74.9
Vote Accuracy	94.3	100	50	81.4	97.1	95.7	72.9	100	92.9	87.1
