# Supplementary material for: Ellipse-Fit Alignment for Robust 2D Shape Recognition
Source: Research Square preprint supplement (doi:10.21203/rs.3.rs-5716650/v1), 2024-12-30
Supplement: Supplementary file 9 [file Kimia_8test_3train_Accuracies.xlsx]

## Sheet: Sheet1
Row	Class1	Class2	Class3	Class4	Class5	Class6	Class7	Class8	Class9	Overall
TPR Accuracy	0	80	11.3	56.3	65	93.8	72.5	100	0	53.2
TNR Accuracy	20	0	1.3	12.5	0	0	5	20	100	17.6
PPV Accuracy	52.5	0	16.3	70	0	0	28.8	65	100	37
NPV Accuracy	0	82.5	11.3	58.8	72.5	95	72.5	100	0	54.7
FPR Accuracy	20	0	1.3	12.5	0	0	5	20	100	17.6
FNR Accuracy	0	80	11.3	56.3	65	93.8	72.5	100	0	53.2
FDR Accuracy	52.5	0	16.3	70	0	0	28.8	65	100	37
FOR Accuracy	0	82.5	11.3	58.8	72.5	95	72.5	100	0	54.7
TS Accuracy	100	100	66.3	83.8	97.5	96.3	72.5	100	77.5	88.2
ACC Accuracy	98.8	98.8	73.8	80	98.8	96.3	72.5	100	95	90.4
BA Accuracy	55	96.3	25	75	93.8	96.3	75	100	20	70.7
F1 Accuracy	100	100	66.3	83.8	97.5	96.3	72.5	100	77.5	88.2
MCC Accuracy	100	98.8	68.8	82.5	97.5	97.5	72.5	100	73.8	87.9
FM Accuracy	100	100	67.5	82.5	97.5	97.5	72.5	100	72.5	87.8
BM Accuracy	55	96.3	25	75	93.8	96.3	75	100	20	70.7
MK Accuracy	71.3	96.3	28.8	73.8	40	73.8	60	98.8	100	71.4
Vote Accuracy	96.3	100	40	76.3	95	96.3	73.8	100	87.5	85
