# Supplementary material for: Ellipse-Fit Alignment for Robust 2D Shape Recognition
Source: Research Square preprint supplement (doi:10.21203/rs.3.rs-5716650/v1), 2024-12-30
Supplement: Supplementary file 10 [file Kimia_9test_2train_Accuracies.xlsx]

## Sheet: Sheet1
Row	Class1	Class2	Class3	Class4	Class5	Class6	Class7	Class8	Class9	Overall
TPR Accuracy	0	78.9	7.8	32.2	54.4	92.2	57.8	100	0	47
TNR Accuracy	20	0	1.1	17.8	0	0	2.2	13.3	100	17.2
PPV Accuracy	45.6	0	13.3	52.2	1.1	0	20	65.6	100	33.1
NPV Accuracy	0	80	8.9	35.6	57.8	93.3	58.9	100	0	48.3
FPR Accuracy	20	0	1.1	17.8	0	0	2.2	13.3	100	17.2
FNR Accuracy	0	78.9	7.8	32.2	54.4	92.2	57.8	100	0	47
FDR Accuracy	45.6	0	13.3	52.2	1.1	0	20	65.6	100	33.1
FOR Accuracy	0	80	8.9	35.6	57.8	93.3	58.9	100	0	48.3
TS Accuracy	98.9	98.9	64.4	76.7	91.1	92.2	62.2	100	74.4	84.3
ACC Accuracy	94.4	98.9	74.4	71.1	87.8	92.2	65.6	100	97.8	86.9
BA Accuracy	47.8	96.7	15.6	57.8	73.3	92.2	62.2	100	12.2	62
F1 Accuracy	98.9	98.9	64.4	76.7	91.1	92.2	62.2	100	74.4	84.3
MCC Accuracy	98.9	98.9	64.4	73.3	91.1	92.2	64.4	100	67.8	83.4
FM Accuracy	98.9	98.9	63.3	72.2	90	92.2	62.2	100	66.7	82.7
BM Accuracy	47.8	96.7	15.6	57.8	73.3	92.2	62.2	100	12.2	62
MK Accuracy	57.8	88.9	28.9	57.8	31.1	66.7	55.6	95.6	100	64.7
Vote Accuracy	93.3	98.9	25.6	61.1	73.3	91.1	61.1	100	83.3	76.4
